# Supplementary material
Source: PubMed Central journal article supplement (PMC3495822)
Supplement: cc-11-3792-s01.pdf [file cc-11-3792-s01.pdf]

## **Supplemental Material to:**

**Guoliang Wang, Xiangyan Tong, Stephanie Weng and  
Huilin Zhou**

**Multiple phosphorylation of Rad9 by CDK is required for  
DNA damage checkpoint activation**

**2012; 11(20)**

**<http://dx.doi.org/10.4161/cc.21987>**

**<http://www.landesbioscience.com/journals/cc/article/21987>**

**Table 1. Yeast strains used in this study**

| Strain  | Genotype                                                                                          |
|---------|---------------------------------------------------------------------------------------------------|
| SCY249  | <i>MATa URA3-52 leu2Δ1 TRP1Δ63 his3Δ200 lys2ΔBgl hom3-10 ade2Δ1 ade8 arg4Δ sml1Δ::TRP</i>         |
| HZY294  | SCY249 with <i>rad9-10AP(S11A,S26A,S56A,S83A,T110A,T125A,T143A,T155A,T218A,S248A)::G418</i>       |
| HZY358  | <i>MATalpha mrc1Δ::URA</i>                                                                        |
| HZY552  | SCY249 with <i>rad9Δ::his</i>                                                                     |
| HZY584  | SCY249 with <i>rad9-11AP(S11A,S26A,S56A,S83A,T110A,T125A,T143A,T155A,T218A,S248A,T348A)::G418</i> |
| HZY1034 | SCY249 with <i>rad9-8AP(S11A,S26A,S56A,S83A,T143A,T348A,S462A,S618A),K1088E::G418</i>             |
| HZY1037 | Diploid <i>MATalpha mrc1Δ::URA X MATa rad9-8AP::G418 sml1Δ::TRP</i>                               |
| HZY1041 | SCY249 with <i>rad9-8AP,K1088E-3HA::G418</i>                                                      |
| HZY1045 | Diploid <i>MATalpha mrc1Δ::URA X MATa rad9-K1088E::G418 sml1Δ::TRP</i>                            |
| HZY1050 | SCY249 with <i>rad9-K1088E::G418</i>                                                              |
| HZY1051 | SCY249 with <i>rad9-K1088E-3HA::G418</i>                                                          |
| HZY1060 | Diploid <i>MATalpha mrc1Δ::URA X MATa rad9-8AP,K1088E::G418 mrc1Δ::URA sml1Δ::TRP</i>             |
| HZY1091 | SCY249 with <i>RAD9-3HA::HIS</i>                                                                  |
| HZY1092 | SCY249 with <i>rad9-K1088E-3HA::HIS</i>                                                           |
| HZY1100 | SCY249 with <i>RAD9-3HA::G418</i>                                                                 |
| HZY1102 | SCY249 with <i>rad9-8AP-3HA::G418</i>                                                             |
| HZY1125 | Diploid <i>MATalpha mrc1Δ::URA X MATa rad9Δ::HIS sml1Δ::TRP</i>                                   |
| HZY1129 | Diploid <i>MATalpha mrc1Δ::URA X MATa rad9-11AP::G418 sml1Δ::TRP</i>                              |
| HZY1134 | Diploid <i>MATalpha mrc1Δ::URA X MATa rad9-10AP::G418 sml1Δ::TRP</i>                              |
| HZY1144 | SCY249 with <i>rad9-8AP::G418</i>                                                                 |
| HZY1150 | <i>MATalpha rad9-8AP::G418 mrc1Δ::URA sml1Δ::TRP</i>                                              |
| HZY1438 | <i>MATalpha SLD3-dpb11-ΔN::G418 dpb11Δ::HYGRO</i>                                                 |
| HZY1440 | <i>MATa SLD3-dpb11-ΔN::G418 dpb11Δ::HYGRO RAD9-3HA::HIS</i>                                       |
| GWY059  | SCY249 with <i>rad9-6AP(S462A,T474A,S494A,S507A,S584A,S618A)-3HA::HIS</i>                         |
| GWY060  | SCY249 with <i>rad9-6AP,K1088E-3HA::HIS</i>                                                       |
| GWY067  | SCY249 with <i>rad9-3AP(S462A,T474A,S618A),K1088E-3HA::HIS</i>                                    |
| GWY069  | STY323 with <i>mrc1Δ::G418</i>                                                                    |
| GWY074  | SCY249 with <i>rad9-2AP-1(S462A,T474A)-3HA::HIS</i>                                               |
| GWY076  | SCY249 with <i>rad9-2AP-1,K1088E-3HA::HIS</i>                                                     |
| GWY077  | GWY100 with <i>mrc1Δ::G418 rad9-11AP-3HA::HIS</i>                                                 |
| GWY078  | STY327 with <i>mrc1Δ::G418</i>                                                                    |
| GWY079  | GWY101 with <i>mrc1Δ::G418</i>                                                                    |
| GWY080  | GWY074 with <i>mrc1Δ::URA</i>                                                                     |
| GWY081  | GWY076 with <i>mrc1Δ::URA</i>                                                                     |
| GWY082  | SCY249 with <i>rad9-2AP-2(S462A,S618A)-3HA::HIS</i>                                               |
| GWY084  | SCY249 with <i>rad9-2AP-2,K1088E-3HA::HIS</i>                                                     |
| GWY086  | GWY082 with <i>mrc1Δ::URA</i>                                                                     |
| GWY087  | GWY084 with <i>mrc1Δ::URA</i>                                                                     |
| GWY088  | GWY067 with <i>mrc1Δ::URA</i>                                                                     |
| GWY089  | SCY249 with <i>rad9-3AP-3HA::HIS</i>                                                              |
| GWY091  | GWY089 with <i>mrc1Δ::URA</i>                                                                     |
| GWY092  | GWY059 with <i>mrc1Δ::G418</i>                                                                    |
| GWY093  | GWY060 with <i>mrc1Δ::G418</i>                                                                    |

| Strain          | Genotype                                                        |
|-----------------|-----------------------------------------------------------------|
| GWY095 STY301   | with <i>mrc1Δ::URA</i>                                          |
| GWY096 STY302   | with <i>mrc1Δ::URA</i>                                          |
| GWY097 SCY249   | with <i>rad9-S462A-3HA::HIS</i>                                 |
| GWY098 MATa     | <i>SLD3-dpb11-K55E::G418 dpb11Δ::HYGRO RAD9-3HA::HIS</i>        |
| GWY099 MATalpha | <i>SLD3-dpb11-K55E::G418 dpb11Δ::HYGRO rad9-K1088E-3HA::HIS</i> |
| GWY100 SCY249   | with <i>rad9-11AP-3HA::HIS</i>                                  |
| GWY101 SCY249   | with <i>rad9-11AP,K1088E-3HA::HIS</i>                           |
| GWY105          | <i>rad9Δ::URA</i> in HZY1438                                    |
| STY301 SCY249   | with <i>rad9-T348A-3HA::HIS</i>                                 |
| STY302 SCY249   | with <i>rad9-T348A,K1088E-3HA::HIS</i>                          |
| STY323 SCY249   | with <i>rad9-10AP-3HA::HIS</i>                                  |
| STY327 SCY249   | with <i>rad9-10AP,K1088E-3HA::HIS</i>                           |
| STY331 MATa     | <i>SLD3-dpb11-ΔN::G418 dpb11Δ::HYGRO rad9-K1088E-3HA::HIS</i>   |
| STY514 MATa     | <i>rad9-8AP,K1088E::G418 mrc1Δ::URA sml1Δ::TRP</i>              |
| STY549 MATalpha | <i>rad9-K1088E::G418 mrc1Δ::URA sml1Δ::TRP</i>                  |
| STY637 MATalpha | <i>rad9Δ::HIS mrc1Δ::URA sml1Δ::TRP</i>                         |
